# Supplementary material for: The tunable anisotropic Rashba spin–orbit coupling effect in Pb-adsorbed Janus monolayer WSeTe
Source: Royal Society of Chemistry journal article supplement (doi:10.1039/d3cp03331g), 2023-01-01
Supplement: d3cp03331g1.pdf [file d3cp03331g1.pdf]

## Supplementary Information

Tunable anisotropic Rashba spin-orbit coupling effect in Pb-  
adsorbed Janus monolayer WSeTe

Can Yang<sup>1</sup>, Jia Li<sup>1\*</sup>, Xiaoli Liu<sup>1</sup>, Congling Bai<sup>1</sup>

<sup>1</sup>School of Science, Hebei University of Technology, Tianjin 300401, People's

Republic of China

Corresponding author. E-mail address: [jjali@hebut.edu.cn](mailto:jjali@hebut.edu.cn) (Jia Li).

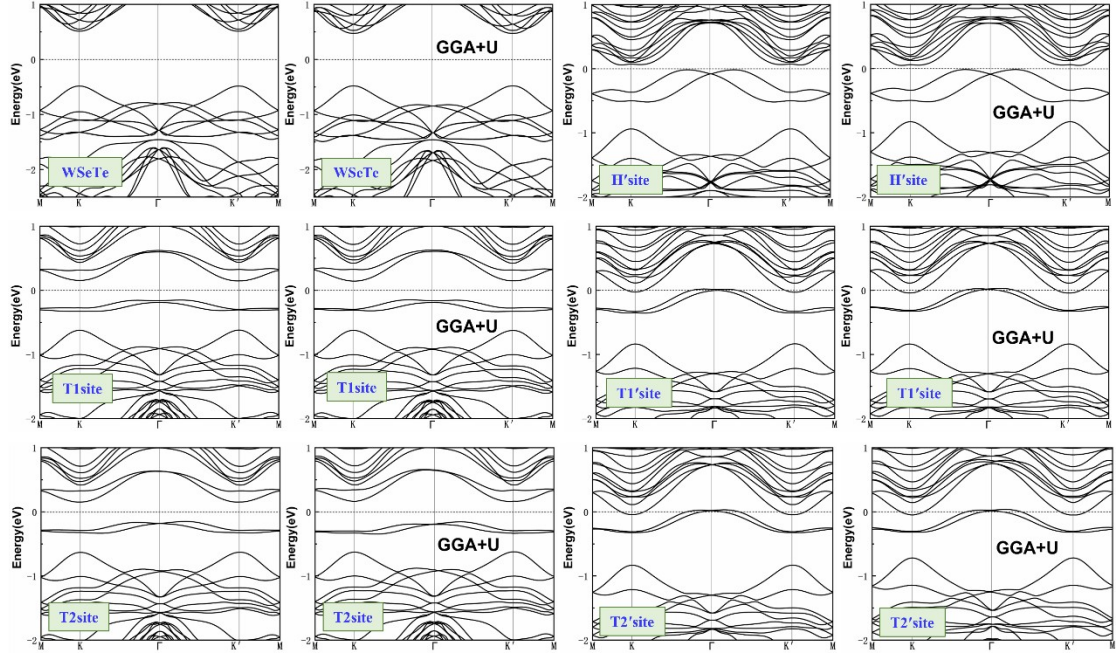

Fig. S1 Band structures of WSeTe ML and Pb-WSeTe system with SOC using PBE/GGA+U functional.

Table S1 Calculated  $E_R$ ,  $K_R$  and Rashba parameters  $\alpha_R$  with different adsorption distance calculated according to DFT.

| system                           | WSeTe | T1    | T2    | H     | T1'   | T2'   | H'    |
|----------------------------------|-------|-------|-------|-------|-------|-------|-------|
|                                  | ML    |       |       |       |       |       |       |
| $E_g^{\text{PBE}}$ (eV)          | 0.99  | 0.303 | 0.302 | 0.288 | /     | /     | 0.075 |
| $E_g^{\text{GGA+U}}$ (eV)        | 0.95  | 0.290 | 0.287 | 0.272 | /     | /     | 0.064 |
| $\alpha_R^{\text{PBE}}$ (eV·Å)   | 0.43  | 0.48  | 0.60  | 0.51  | 0.53  | 0.52  | 0.75  |
| $\alpha_R^{\text{GGA+U}}$ (eV·Å) | 0.443 | 0.477 | 0.613 | 0.513 | 0.535 | 0.522 | 0.757 |

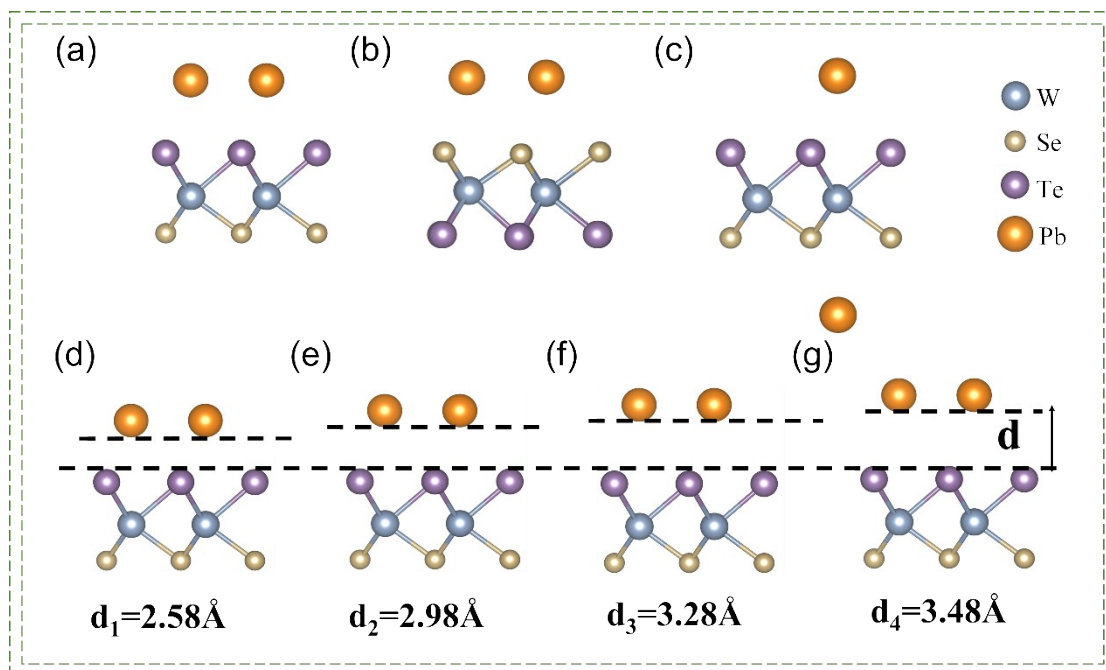

Fig. S2 (a) Te side: two Pb atoms placed parallel to each other above the W atom, (b) Se side: two Pb atoms placed parallel to each other above the W atom, and (c) two Pb atoms placed relative to the W atom. Illustration for four adsorption distances (d)  $d_1 = 2.58 \text{ \AA}$ , (e)  $d_2 = 2.98 \text{ \AA}$ , (f)  $d_3 = 3.28 \text{ \AA}$  and (g)  $d_4 = 3.48 \text{ \AA}$  for the adsorption structure shown in (a).

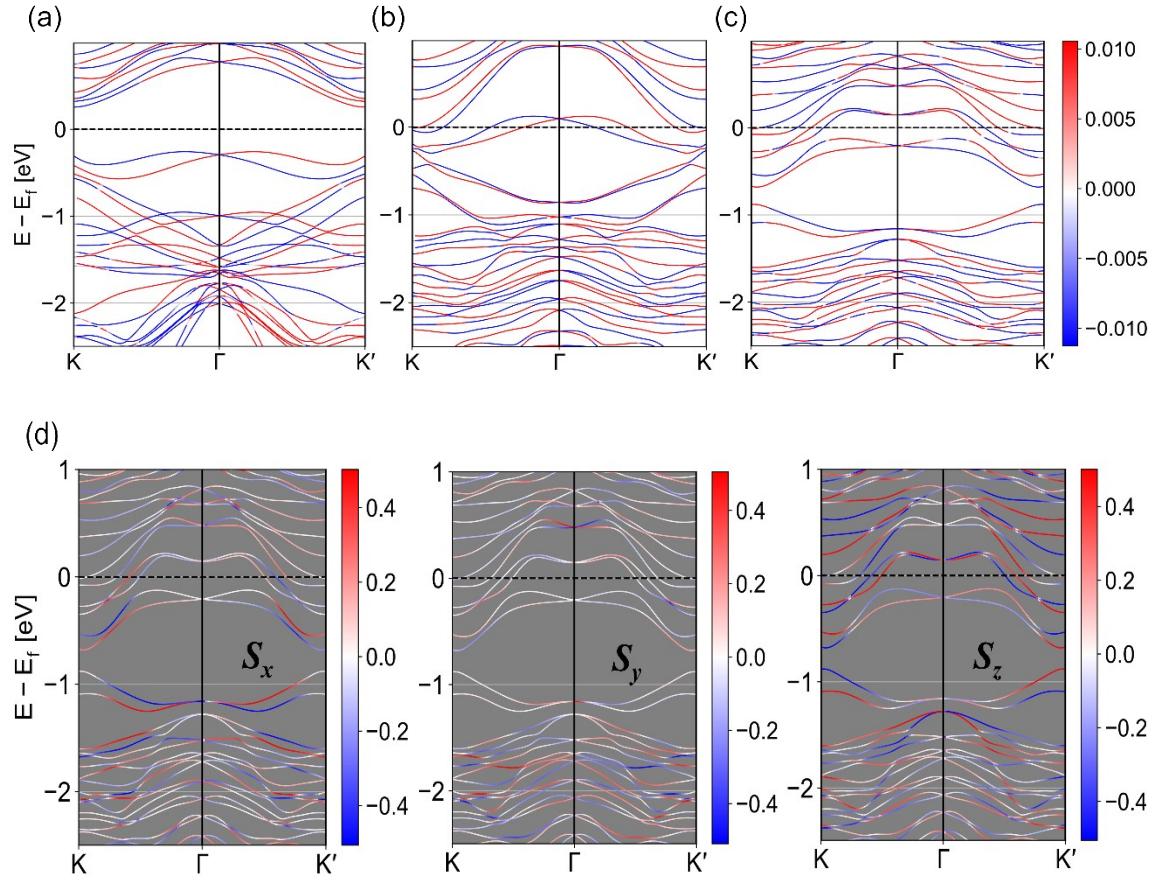

Fig. S3 Spin projected electronic energy bands. (a) Te side : two Pb atoms placed parallel to each other above the W atom, (b) Se side: two Pb atoms placed parallel to each other above the W atom, (c) two Pb atoms placed relative to the W atom, and (d) Spin polarization of two Pb atoms placed relative to the W atom projected to the spin-split bands along the K- $\Gamma$ -K' line. Color bars represent the expectation values of spin component  $S_x$ ,  $S_y$ , and  $S_z$ .

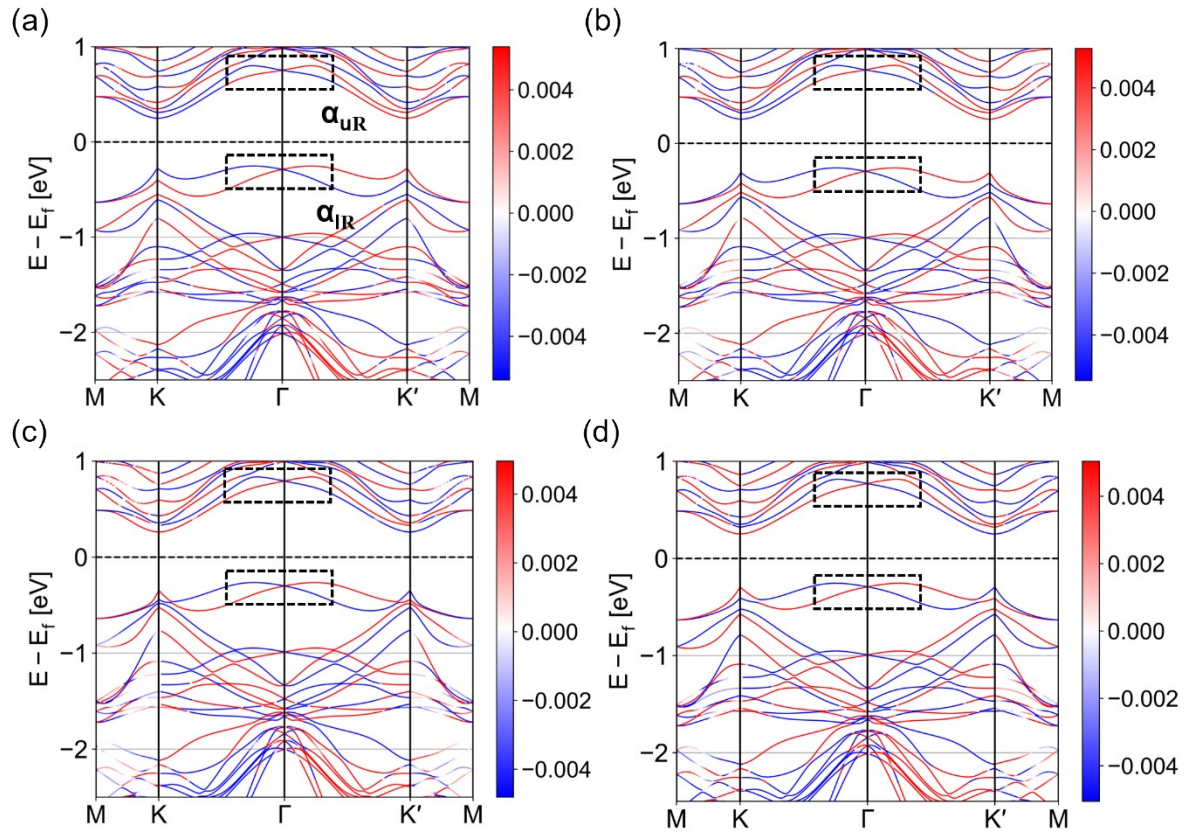

Fig. S4 Spin projected electronic energy band of the adsorption structure shown in S1(a) with four adsorption vertical distances (a)  $d_1=2.58 \text{ \AA}$ , (b)  $d_2=2.98 \text{ \AA}$ , (c)  $d_3=3.28 \text{ \AA}$  and (d)  $d_4=3.48 \text{ \AA}$ . The red and blue colors represent opposite spin directions, and the black dashed rectangles indicate Rashba spin splitting.

Table S2 Calculated  $E_R$ ,  $K_R$  and Rashba parameters  $\alpha_R$  with different adsorption distance calculated according to DFT.

|                                                              | $d_1$<br>upper | $d_1$<br>lower | $d_2$<br>upper | $d_2$<br>lower | $d_3$<br>upper | $d_3$<br>lower | $d_4$<br>upper | $d_4$<br>lower |
|--------------------------------------------------------------|----------------|----------------|----------------|----------------|----------------|----------------|----------------|----------------|
| <b><math>E_R</math>(eV)</b>                                  | 0.0481         | 0.0368         | 0.0474         | 0.0354         | 0.0425         | 0.0347         | 0.0438         | 0.0395         |
| <b><math>K_R</math>(<math>\text{\AA}^{-1}</math>)</b>        | 0.1336         | 0.1337         | 0.1336         | 0.1337         | 0.1215         | 0.1336         | 0.1336         | 0.1579         |
| <b><math>\alpha_R</math>(eV<math>\cdot\text{\AA}</math>)</b> | 0.72           | 0.55           | 0.71           | 0.53           | 0.70           | 0.52           | 0.64           | 0.50           |

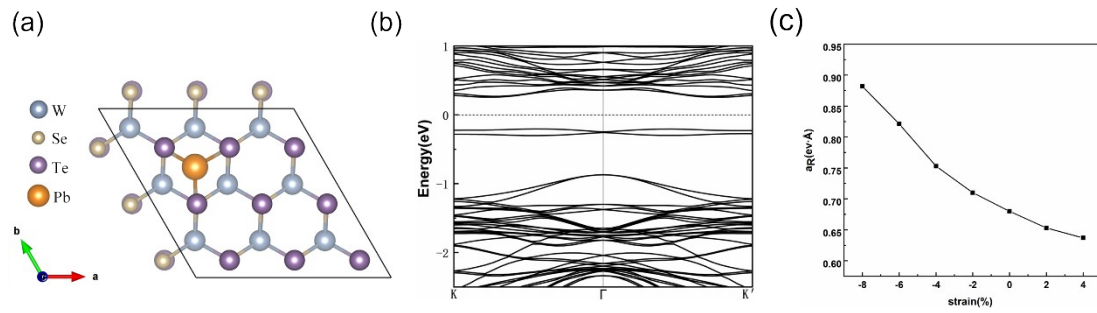

Fig. S5 Pb absorbed  $3 \times 3 \times 1$  supercell WSeTe of H' site. (a) Top view, (b) Band structure with SOC, (c) Variation of the Rashba parameters of the Rashba bands close to the neighborhood of the Fermi energy as a function of biaxial strain.
